# Supplementary material for: Dopamine neurons projecting to medial shell of the nucleus accumbens drive heroin reinforcement
Source: eLife journal article supplement (doi:10.7554/elife.39945), 2018-10-29
Supplement: supp [file elife-39945-supp-v1.zip]

Archive with 2 entries (2 files):
- elife_poa_e39945_Transparent_Reporting_File.pdf
- elife_poa_e39945_Supplementary_File_1.xlsx
