# Supplementary material for: Dopamine neurons projecting to medial shell of the nucleus accumbens drive heroin reinforcement
Source: eLife journal article supplement (doi:10.7554/elife.39945), 2018-10-29
Supplement: supp [file elife-39945-supp-v1.zip › elife_poa_e39945_Supplementary_File_1.xlsx]

## Sheet: Feuil1
Figure	Measure	Comparisons	Analysis	Effect	Statistic value	P value
1f	Lever press (LP)	Saline vs heroin	Two-way repeated-measure (RM) ANOVA	Group	F3, 44 = 47.16	<0.0001
				Time	F11, 484 = 6.464	<0.0001
				Group x Time	F33, 484 = 6.28	<0.0001
			Bonferroni (post hoc)	Saline (active LP) vs Heroin (active LP)	t44 = 9.453	<0.0001
				Heroin (active LP) vs Heroin (inactive LP)	t44 = 9.482	<0.0001
				Saline (inactive LP) vs Heroin (active LP)	t44 = 9.358	<0.0001
				Saline (active LP) vs Heroin (inactive LP)	t44 = 0.7974	>0.9999
				Saline (active LP) vs Saline (inactive LP)	t44 = 0.0888	>0.9999
				Saline (active LP) vs Heroin (inactive LP)	t44 = 0.7022	>0.9999
1g	Infusions	Saline vs heroin	Two-way RM ANOVA	Group	F1, 22 = 142.2	<0.0001
				Time	F11, 242 = 30.51	<0.0001
				Group x Time	F11, 242 = 31.13	<0.0001
			Bonferroni (post hoc)	Day 1	t264 = 2.924	0.045
				Day 2	t264 = 3.23	0.0168
				Day 3	t264 = 3.752	0.0026
				Day 4	t264 = 3.826	0.0019
				Day 5	t264 = 3.396	0.0095
				Day 6	t264 = 5.054	<0.0001
				Day 7	t264 = 8.507	<0.0001
				Day 8	t264 = 10.04	<0.0001
				Day 9	t264 = 11.29	<0.0001
				Day 10	t264 = 12.07	<0.0001
				Day 11	t264 = 13.89	<0.0001
				Day 12	t264 = 14.26	<0.0001
1i	Lever press (LP)	Saline vs heroin	Unpaired t-test		t10 = 2.31	0.0435
2f	dF/F	Saline vs heroin	Paired t-test		t6 = 4.117	0.0062
2f	dF/F	Saline vs citalopran; reboxetine; cocaine	One-way RM ANOVA	Treatment	F3, 15 = 42.48	P = 0.0025
				Saline vs citalopram	t3 = 0.39	>0.9999
				Saline vs reboxetine	t3 = 0.006	>0.9999
				Saline vs cocaine	t3 = 6.634	P = 0.04019
				citalopram vs reboxetine	t3 = 0.1338	>0.9999
				citalopram vs cocaine	t3 = 6.774	P = 0.0394
				reboxetine vs cocaine	t3 = 7.510	P = 0.0294
2i	dF/F	Saline vs heroin	Wilcoxon matched-pairs signed rank test		Z = 66	0.001
4d	Lever press (LP)	DATCre+ vs DATCre-	Two-way RM ANOVA	Group	F3, 14 = 21.81	<0.0001
				Time	F3, 42 = 1.364	0.2668
				Group x Time	F9, 42 = 1.328	0.2517
			Bonferroni (post hoc)	DATCre+ (Active LP) vs DATCre+ (Inactive LP)	t14 = 2.06	0.3511
				DATCre+ (Active LP) vs DATCre- (Active LP)	t14 = 5.301	0.0007
				DATCre+ (Active LP) vs DATCre- (Inactive LP)	t14 = 1.931	0.444
				DATCre+ (Inactive LP) vs DATCre- (Active LP)	t14 = 7.243	<0.0001
				DATCre+ (Inactive LP) vs DATCre- (Inactive LP)	t14 = 0.112	>0.9999
				DATCre- (Active LP) vs DATCre- (Inactive LP)	t14 = 6.861	<0.0001
4e	Infusions	DATCre+ vs DATCre-	Two-way RM ANOVA	Group	F1, 7 = 12.25	0.0100
				Time	F3, 21 = 2.664	0.0743
				Group x Time	F3, 21 = 2.816	0.0640
			Bonferroni (post hoc)	Day 11	t28 = 2.822	0.0347
				Day 12	t28 = 2.167	0.1557
				Day 13	t28 = 3.388	0.0084
				Day 14	t28 = 4.183	0.001
4g	Lever press (LP)	DATCre+ vs DATCre-	Two-way RM ANOVA	Group	F3, 16 = 37.14	<0.0001
				Time	F4, 64 = 3.755	0.0083
				Group x Time	F12, 64 = 2.959	0.0025
			Bonferroni (post hoc)	DATCre+ (Active LP) vs DATCre+ (Inactive LP)	t16 = 1.035	>0.9999
				DATCre+ (Active LP) vs DATCre- (Active LP)	t16 = 8.778	<0.0001
				DATCre+ (Active LP) vs DATCre- (Inactive LP)	t16 = 0.199	>0.9999
				DATCre+ (Inactive LP) vs DATCre- (Active LP)	t16 = 9.703	<0.0001
				DATCre+ (Inactive LP) vs DATCre- (Inactive LP)	t16 = 1.125	>0.9999
				DATCre- (Active LP) vs DATCre- (Inactive LP)	t16 = 7.83	<0.0001
4h	Infusions	DATCre+ vs DATCre-	Two-way RM ANOVA	Group	F1, 8 = 168.6	0.0001
				Time	F4, 32 = 13.52	<0.0001
				Group x Time	F4, 32 = 8.269	0.0001
			Bonferroni (post hoc)	Day 1	t40 = 0.5892	>0.9999
				Day 2	t40 = 5.032	<0.0001
				Day 3	t40 = 3.989	0.0014
				Day 4	t40 = 2.548	0.0739
				Day 10	t40 = 8.734	<0.0001
5g	Lever Press (LP)	DATCre+ vs DATCre-	Two-way RM ANOVA	Group	F3, 30 = 38.27	<0.0001
				Time	F7, 210 = 0.4947	0.8378
				Group x Time	F21, 210 = 2.179	0.0029
			Bonferroni (post hoc)	DATCre+ (Active LP) vs DATCre- (Active LP)	t30 = 8.024	<0.0001
				DATCre+ (Active LP) vs DATCre+ (Inactive LP)	t30 = 8.756	<0.0001
				DATCre+ (Active LP) vs DATCre- (Inactive LP)	t30 = 8.066	<0.0001
				DATCre- (Active LP) vs DATCre+ (Inactive LP)	t30 = 0.6676	>0.9999
				DATCre- (Active LP) vs DATCre- (Inactive LP)	t30 = 0.0369	>0.9999
				DATCre+ (Inactive LP) vs DATCre- (Inactive LP)	t30 = 0.7096	>0.9999
5h	Laser stimulation	DATCre+ vs DATCre-	Two-way RM ANOVA	Group	F1, 15 = 581.8	<0.0001
				Time	F7, 105 = 3.938	0.0007
				Group x Time	F7, 105 = 8.233	<0.0001
			Bonferroni (post hoc)	Day 1	t120 = 12.94	<0.0001
				Day 2	t120 = 14.93	<0.0001
				Day 3	t120 = 17.41	<0.0001
				Day 4	t120 = 17.29	<0.0001
				Day 5	t120 = 18.29	<0.0001
				Day 6	t120 = 19.17	<0.0001
				Day 7	t120 = 18.43	<0.0001
				Day 8	t120 = 18.81	<0.0001
5j	Distance travelled	Heroin concentrations	One-way RM ANOVA	Treatment	F2.475, 12.37 = 581.8	0.0084
			Bonferroni (post hoc)	0 vs 4 (mg/kg)	t5 = 0.7859	>0.9999
				0 vs 8 (mg/kg)	t5 = 3.02	0.2943
				0 vs 16 (mg/kg)	t5 = 4.883	0.0254
				0 vs 32 (mg/kg)	t5 = 3,821	0.0412
